# Supplementary material for: Simultaneous generation of hydroxyl and hydrogen radicals from H + /OH − pairs caused by water–solid contact electrification
Source: Royal Society of Chemistry journal article supplement (doi:10.1039/d4sc06227b), 2024-01-01
Supplement: d4sc06227b1.pdf [file d4sc06227b1.pdf]

# Simultaneous Generation of Hydroxyl and Hydrogen Radicals from $H^+/OH^-$ Pairs Caused by Water-Solid Contact Electrification

Fengjie Chen<sup>a1</sup>, Jingde Wu<sup>b1</sup>, Dou Wang<sup>c</sup>, Yu Xia<sup>a</sup>, Qingyuan Song<sup>d</sup>, Ying Liang<sup>a</sup>, Pu Wang<sup>a</sup>, Bolei Chen<sup>a,d\*</sup>,  
Yong Liang<sup>a</sup>, Yongguang Yin<sup>d</sup>, Yawei Wang<sup>a,d</sup>, Maoyong Song<sup>d</sup> and Guibin Jiang<sup>d</sup>

---

<sup>a</sup> *Hubei Key Laboratory of Environmental and Health Effects of Persistent Toxic Substances, School of Environment and Health, Jiangnan University, Wuhan 430056, China.*

<sup>b</sup> *School of Environment, Hangzhou Institute for Advanced Study, UCAS, Hangzhou, 310000, China.*

<sup>c</sup> *State Key Laboratory for Managing Biotic and Chemical Treats to the Quality and Safety of Agro-products, Institute of Agro-product Safety and Nutrition, Zhejiang Academy of Agricultural Science, Hangzhou, 310012, China.*

<sup>d</sup> *State Key Laboratory of Environmental Chemistry and Ecotoxicology, Research Center for Eco-Environmental Sciences, Chinese Academy of Sciences, Beijing, 10085, China.*

<sup>1</sup>These authors contributed equally to this work.

## Experimental Section

**Chemicals.** SiO<sub>2</sub> microspheres used in this study were purchased from Aladdin Chemistry Co., Ltd. (Shanghai, China). 5,5-dimethyl-1-pyrroline N-oxide (DMPO), resazurin, and 2',7'-dichlorodihydrofluorescein diacetate (DCFH-DA) were obtained from Sigma-Aldrich company (Shanghai, China). Deuterium oxide (D<sub>2</sub>O) was purchased from Meryer Biochemical Technology Co., Ltd. (Shanghai, China) Na<sup>15</sup>NO<sub>3</sub> was obtained from Guangzhou test research Technology Co., Ltd. (Guangzhou, China) All other chemical reagents used in this study were purchased from Sinopharm Chemical Reagent Co, Ltd. (Shanghai China).

**Construction of Water–solid contact model.** The devices consisted of a sealing cylindrical tube with 4 cm (diameter) × 10 cm (length) and two gas bottles. The two gas bottles are connected by Teflon tubes in front and behind the sealing cylindrical tube, respectively. Then, adding 100 mL of water to two gas bottles, and 15g of SiO<sub>2</sub> nanoparticles to the sealing cylindrical tube. Different flow rates (50, 100, 200 mL/min) of argon gas pass through the first gas bottles, the sealing cylindrical tube, and the second gas bottles successively to construct the water–solid contact model for this study.

**Fluorescence imaging.** DCFH-DA and resazurin were used in the experiments as fluorescent probes for oxidizability and reducibility of SiO<sub>2</sub> during water–solid contact, respectively. Dilute DCFH-DA (v/v = 1/1000) in reconstituted loading buffer solution was prepared as the working solution. The working concentration of resazurin is 100 nM. After a period of contact between water and SiO<sub>2</sub> nanospheres, DCFH-DA and resazurin aqueous solution was added into the SiO<sub>2</sub> nanospheres, and then they were placed under an inverted fluorescence microscope for the observation. 488 and 570 nm laser were applied as an excitation light source, respectively. The exposure time was fixed.

**Measurements of radicals.** Hydroxyl radicals (•OH) and hydrogen radicals (•H) were trapped by 50 mM DMPO and detected by a Bruker A300-10/12 electron spin resonance (ESR) spectrometer (Germany) at ambient temperature.

**Nitrate reduction and nitrite oxidation.** 1 M nitrate or nitrite was dissolved in the first gas bottles of the water–solid contact model system. After a period of contact between the nitrate or nitrite solution and SiO<sub>2</sub> nanospheres, the nitrate and nitrite concentration in the second gas bottles was determined via ion chromatography (Dionex ICS-6000, Thermo Fisher Scientific, USA). The mass spectrometry data were collected using a linear ion trap mass spectrometer ((Thermo-Fisher, Waltham, MA). The nano-ESI mode was employed for sample introduction, with samples collected in positive ion mode and an applied voltage controlled at 1.5 kV.

**Potential change and current density experiments.** O<sub>2</sub> plasma was used to increase the surface hydroxyl groups density and thermal annealing was used to reduce the surface hydroxyl groups density of the glass substrate. The commercial SiO<sub>2</sub> substrate was used as the control. The Boehm titration method was used to determine the hydroxyl density of the material surface. The SiO<sub>2</sub> substrate was cut into a 0.5 × 0.5 cm square and a 2 g sample was dissolved into 25 mL anhydrous ethanol, followed by adding 75 mL of 20 wt% NaCl solution. The solution was stirred slowly and a pH meter (Mettler, SevenExcellence) was used to detect the overall pH change of the solution in real time. The pH of the solution was adjusted to 4 with 0.1 M HCl. After the pH was stabilized, 0.1 M NaOH solution was slowly added dropwise to bring the pH of the solution back to 9 and the amount of NaOH was recorded. The density of hydroxyl groups per square nanometer on the surface of the material was calculated according to the following equation:

$$N = \frac{CVN_A \times 10^{-3}}{S}$$

where C is the concentration of NaOH (mol/L), V (mL) is the volume of NaOH consumed as the pH rises from 4 to 9, N<sub>A</sub> is Avogadro's constant, and S is the surface area of the samples.

The potential changes of the SiO<sub>2</sub> substrate with different surface hydroxyl groups density were obtained by (KPFM) experiments. Experiments were performed on a atomic force microscope (AFM) instrument (Multimode 8 Bruker, USA). AFM probe (NSC18, Mikro-Mash, USA; Au coated; tip radius: 25 nm; spring constant: 2.8 N m<sup>-1</sup>) was used as the conductive tip. At the same time, we also used conductive glass as the substrate and cooperated with the Keithley 6514 electrometer to detect the drop of DI water on the conductive glass with different surface hydroxyl groups to record the change of the current.

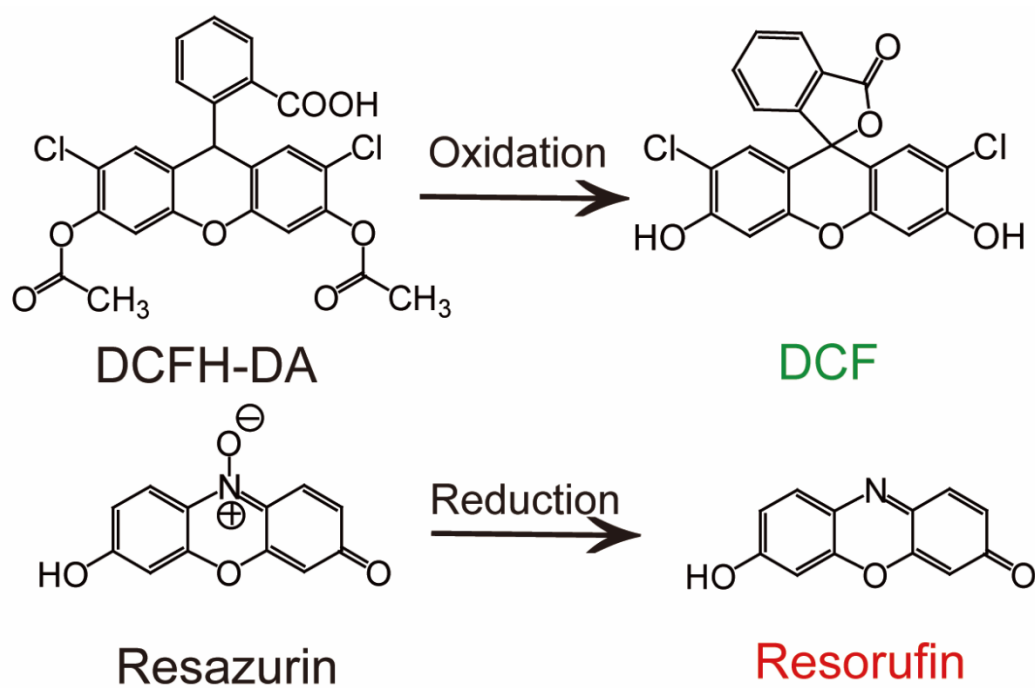

**Figure S1.** (A) Reaction scheme between DCFH-DA and ROS; (B) Reaction scheme between Resazurin and reductive species.

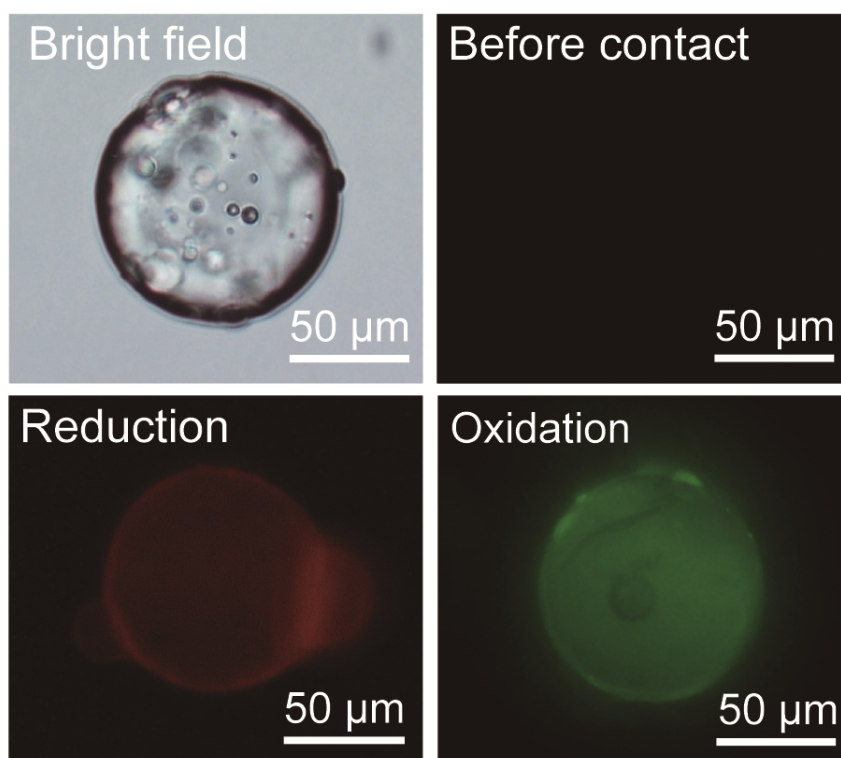

**Figure S2.** (A) Typical brightfield microscopy image of a SiO<sub>2</sub> microsphere; (B) The fluorescence image of a SiO<sub>2</sub> microsphere after contact with water-carrying argon gas (obtained by bubbling the gas into Resazurin aqueous solution with concentration of 100 nM) under 570 nm laser excitation; (C) The corresponding fluorescence image of the SiO<sub>2</sub> microsphere before the contact in B. (D) The fluorescence image of a SiO<sub>2</sub> microsphere after contact with water-carrying argon gas (obtained by bubbling the gas into diluted DCFH-DA solution ( $v/v = 1/10000$ )) under 488 nm laser excitation; (E) The corresponding fluorescence image of the SiO<sub>2</sub> microsphere before the contact in D.

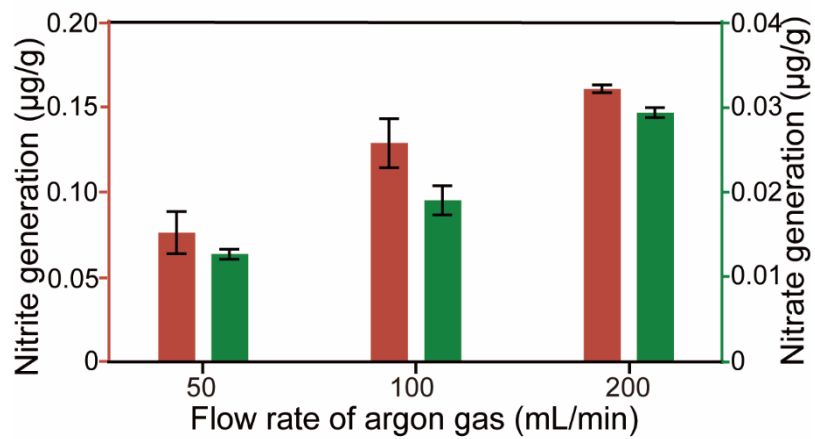

**Figure S3.** Nitrite and nitrate generation during water-solid contact depended on Flow rate of argon gas.

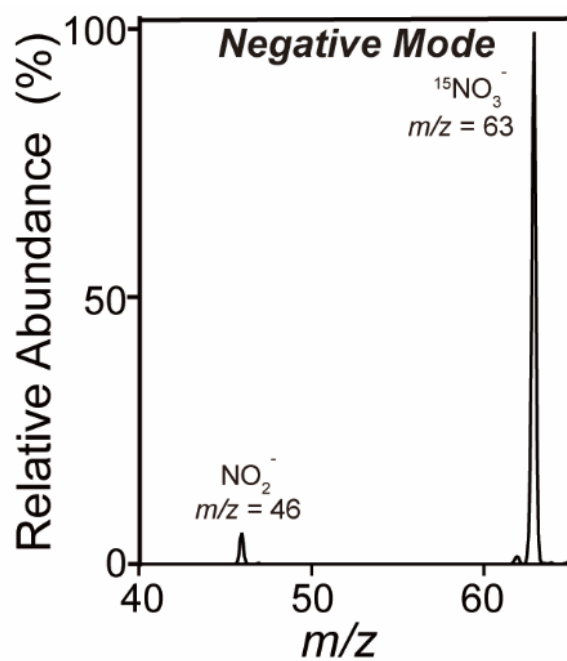

**Figure S4.** MS spectrum in the negative mode of NO<sub>2</sub><sup>-</sup> and <sup>15</sup>NO<sub>3</sub><sup>-</sup> before the contact between SiO<sub>2</sub> and moist argon gas containing both nitrate and nitrite anions.

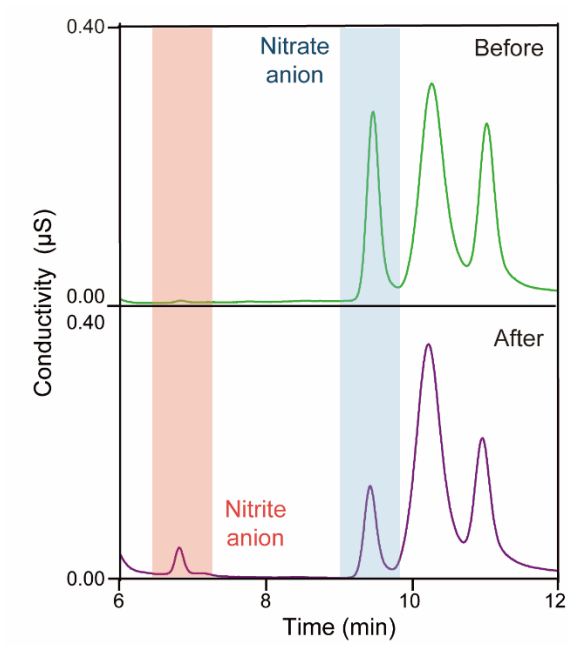

**Figure S5.** Ion chromatography spectra reveal the reduction of  $\text{NaNO}_3$  before and after the contact.



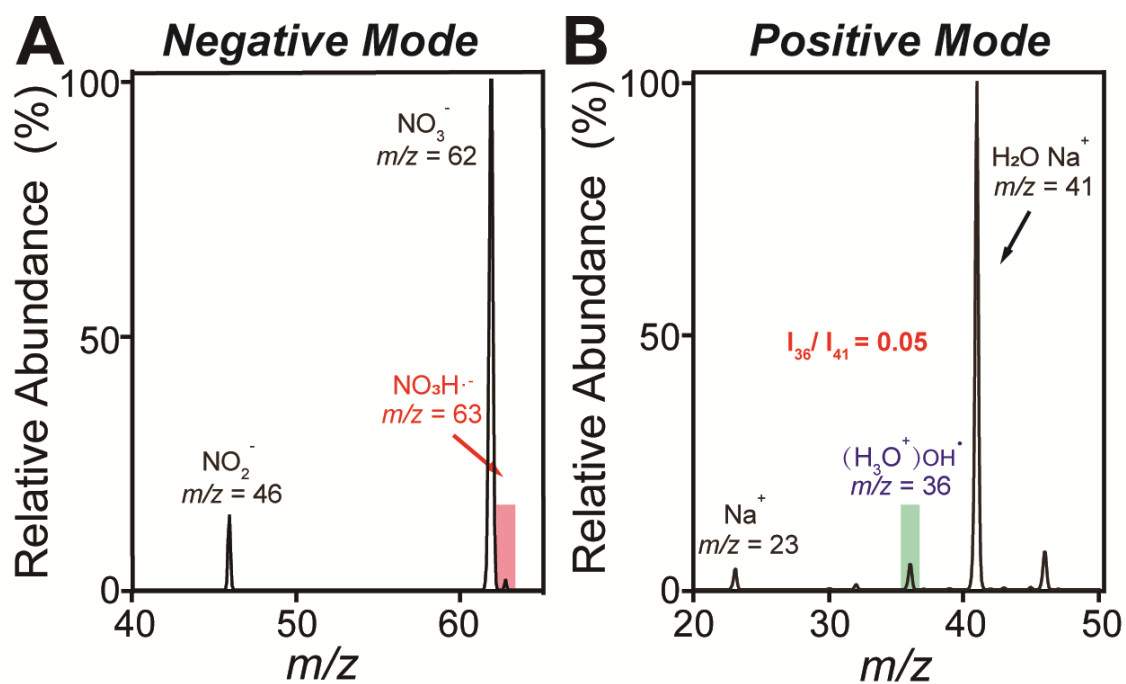

**Figure S6.** MS spectra reveal the reduction of  $\text{NaNO}_3$  after the contact (A) Negative mode and (B) Positive mode.

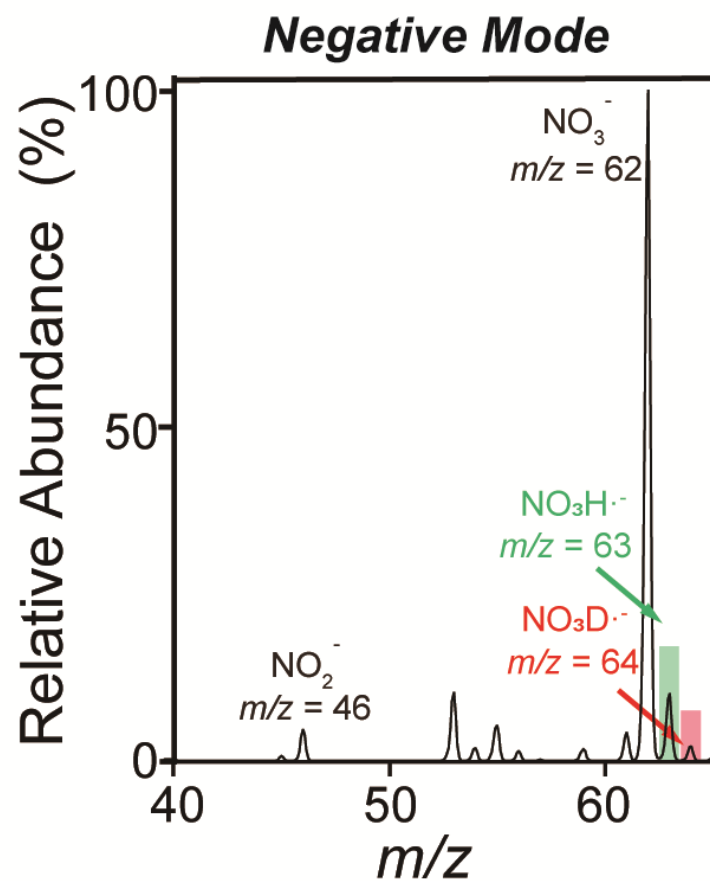

**Figure S7.** The MS spectrum reveals the reduction of  $\text{NaNO}_3$  after the contact between  $\text{D}_2\text{O}$ -carrying argon gas and  $\text{SiO}_2$ .

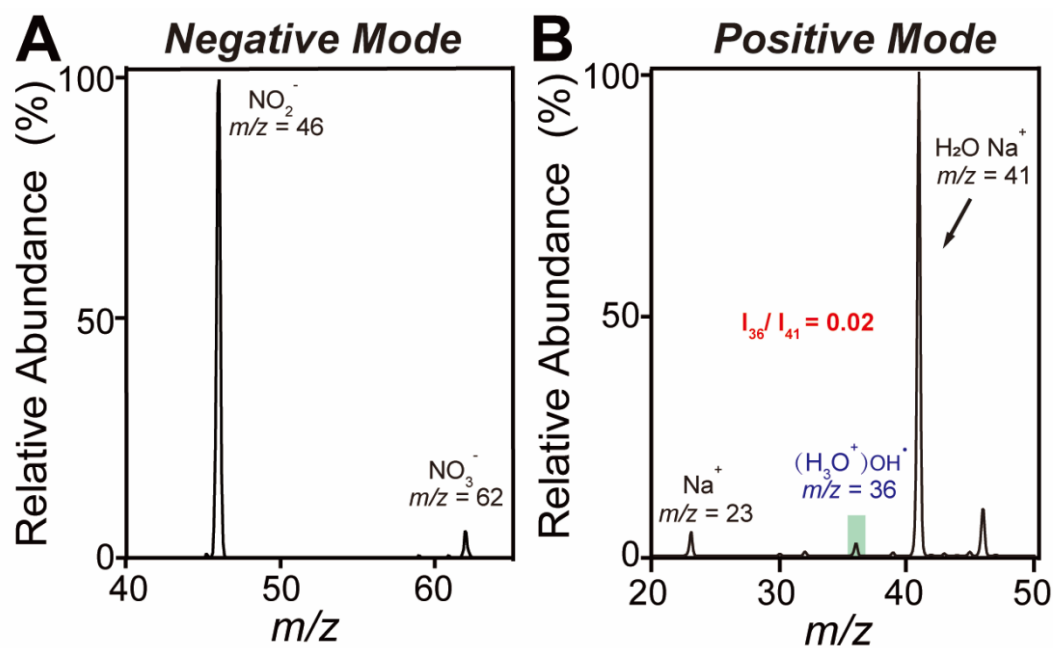

**Figure S8.** MS spectra reveal the oxidation of  $\text{NaNO}_2$  after the contact (A) Negative mode and (B) Positive mode.

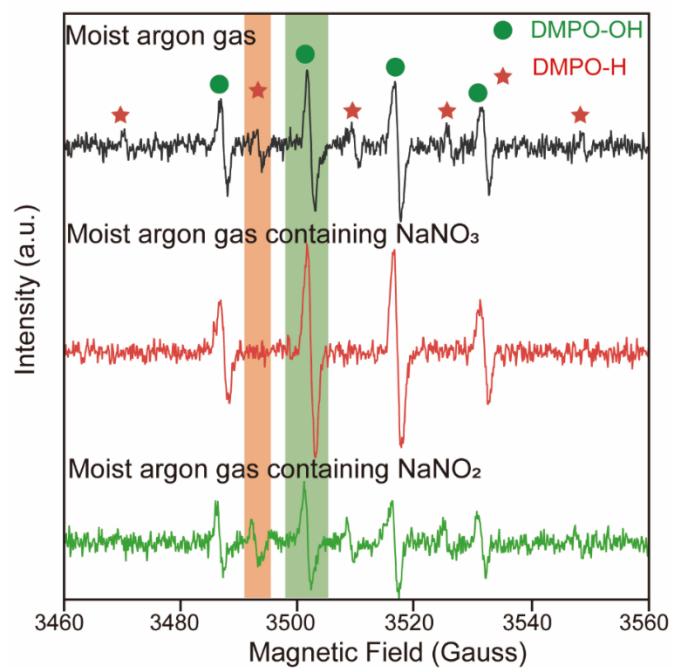

**Figure S9.** ESR spectra of hydroxyl and hydrogen radicals are generated when SiO<sub>2</sub> contacts with moist argon gas, moist argon gas containing NaNO<sub>3</sub>, and moist argon gas containing NaNO<sub>2</sub>, respectively.

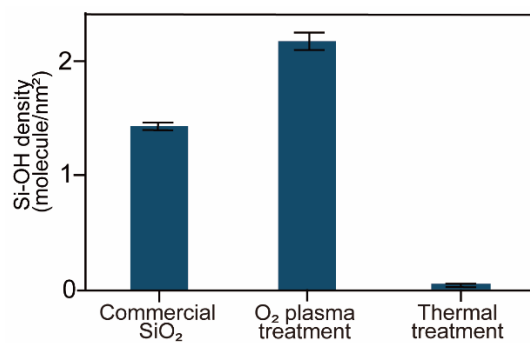

**Figure S10.** The Si-OH density of the commercial SiO<sub>2</sub> sample, and SiO<sub>2</sub> samples treated by O<sub>2</sub> plasma and annealing at 500 °C, respectively.
